# Supplementary material for: Comprehensive analysis of the value of RAB family genes in prognosis of breast invasive carcinoma
Source: Oxford University Press journal article supplement (doi:10.1042/bsr20201103), 2020-05-01
Supplement: bsr-2020-1103_supp.pdf [file bsr-2020-1103_supp.pdf]

A

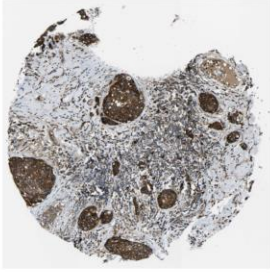

Patient ID: 2392 (Tumor)

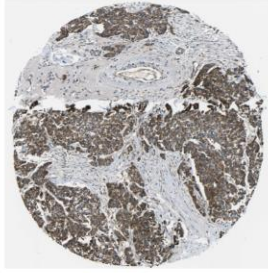

Patient ID: 2073 (Tumor)

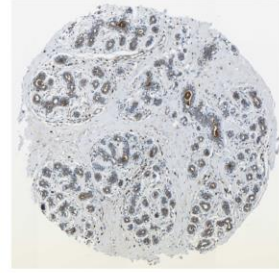

Patient ID: 2773 (Normal)

B

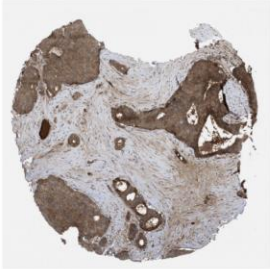

Patient ID: 2428 (Tumor)

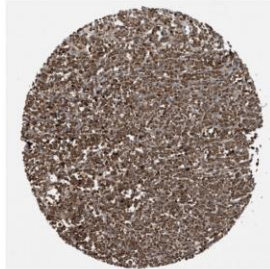

Patient ID: 1910 (Tumor)

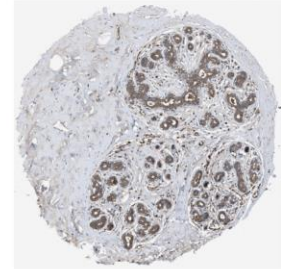

Patient ID: 2773 (Normal)

C

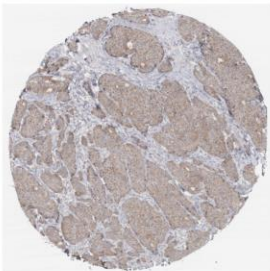

Patient ID: 2428 (Tumor)

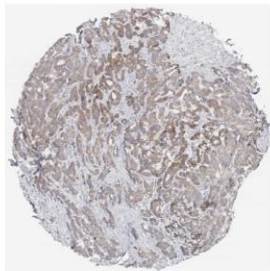

Patient ID: 1939 (Tumor)

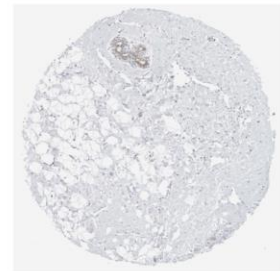

Patient ID: 2773 (Normal)

**Supplementary Figure.1. Protein expression levels in BRCA tissues and normal breast tissues was obtained using immunohistochemical staining from the HumanProteinAtlas. (A) Protein expression of *RAB1B* (B) Protein expression of *RAB2A* (C) Protein expression of *RAB18*.**
